# Supplementary material
Source: PubMed Central journal article supplement (PMC5462017)
Supplement: supp_pp.16.01844_PP2016-01844R2_Supplemental_Materialtbls.pdf [file supp_pp.16.01844_PP2016-01844R2_Supplemental_Materialtbls.pdf]

## Supplementary table

(1) Gene copy number data (yellow highlighted cells indicate barley lines used in the manuscript)

| Sample              | Copies_Hyg |
|---------------------|------------|
| HvEPF1OE-<br>(0.6%) | 5          |
| HvEPF1 OE-<br>(47%) | 1          |
| HvEPF1 OE-1         | 1          |
| HvEPF1 OE-2         | 1          |

(2) Gene primers

| Gene                         | Forward                | Reverse                 |
|------------------------------|------------------------|-------------------------|
| Hygromycin                   | ACTCACCGCGACGTCTG      | GCGCGTCTGCTGCTCCATA.    |
| Hv GAPDH                     | GTGAGGCTGGTGCTGATT     | CGTGGTGCAGCTAGCATTGAGAC |
| Hv Tubulin                   | AGTGCCTGTCCACCCACTC    | AGCATGAAGTGGATCCTTGG    |
| HvEPF1 (qPCR)                | GTGGAGGAGAAGAAGGATGG   | ATGGAGCACTGAAGCTGAC     |
| HvEPF1 (vector construction) | CACCATGAAGAGGCACGGTCTT | CTAGCTGGAGGGGACGGGGT    |
